JANUARY 2015 | VOLUME 66 | NUMBER 1

# Psychiatric Services

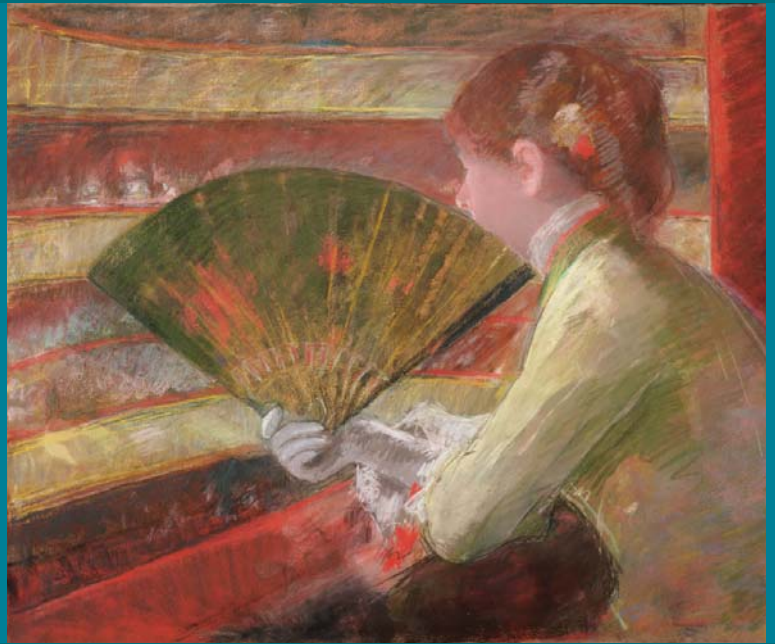

Implementing Advance Directives for People With Serious Mental Illness  
Treatment Use in Borderline Personality Disorder: A 16-Year Cohort Study  
Variation in Service Use Among Latinos, by Country of Origin  
Equine-Assisted Therapy in a State Hospital: A Randomized Trial

A Journal of the American Psychiatric Association  
[ps.psychiatryonline.org](http://ps.psychiatryonline.org)
